# Supplementary material for: Melanoma Affects the Composition of Blood Cell-Derived Extracellular Vesicles
Source: PubMed Central journal article supplement (PMC4960424; doi:10.3389/fimmu.2016.00282), 2016-07-26
Supplement: Table_1.pdf [file Table_1.pdf]

## *Supplementary Material*

### **Melanoma affects the composition of blood cell-derived extracellular vesicles**

**Nina Koliha, Ute Heider, Tobias Ozimkowski, Martin Wiemann, Andreas Bosio, Stefan Wild\***

\* **Correspondence:** Stefan Wild, [Stefan.Wild@miltenyibiotec.de](mailto:Stefan.Wild@miltenyibiotec.de)

#### **Supplementary results and discussion**

To verify that the surface markers on plasma EVs are changed due to melanoma and not because of other variables, we investigated the impact of the anticoagulant and the time between venipuncture and plasma isolation. We suspected these variables to potentially impact the composition of plasma EVs because the blood from melanoma patients was drawn for monitoring analyses, anticoagulated with heparin and might be processed with delays. But citrate was used for the blood of healthy donors as it is recommended in EV research (Mullier et al., 2013; Witwer et al., 2013) and the blood samples were processed directly. A correlation plot with 39 EV surface markers demonstrated that melanoma has a more dramatic impact on the composition of plasma EVs than the anticoagulant or the potential delay during sample preparation (Supplementary table 1).

Some of the markers that we identified as changed due to melanoma are also changed between plasma EVs from blood containing heparin or citrate, namely CD29 and CD42a. However, the difference of these markers between plasma EVs from healthy donors with citrate and plasma EVs from melanoma patients with heparin appear even more pronounced (Supplementary figure 4).

## Supplementary figures and tables

Melanoma EVs

Healthy plasma EVs

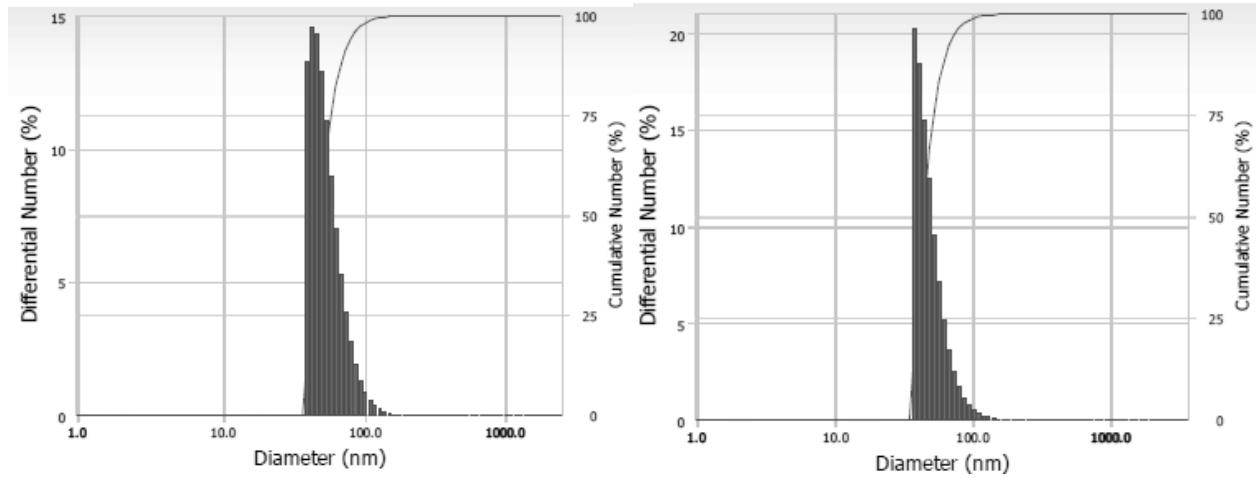

**Supplementary figure 1:** Sizing of EVs using dynamic light scattering (DLS). 98% of EVs were smaller than 100 nm.

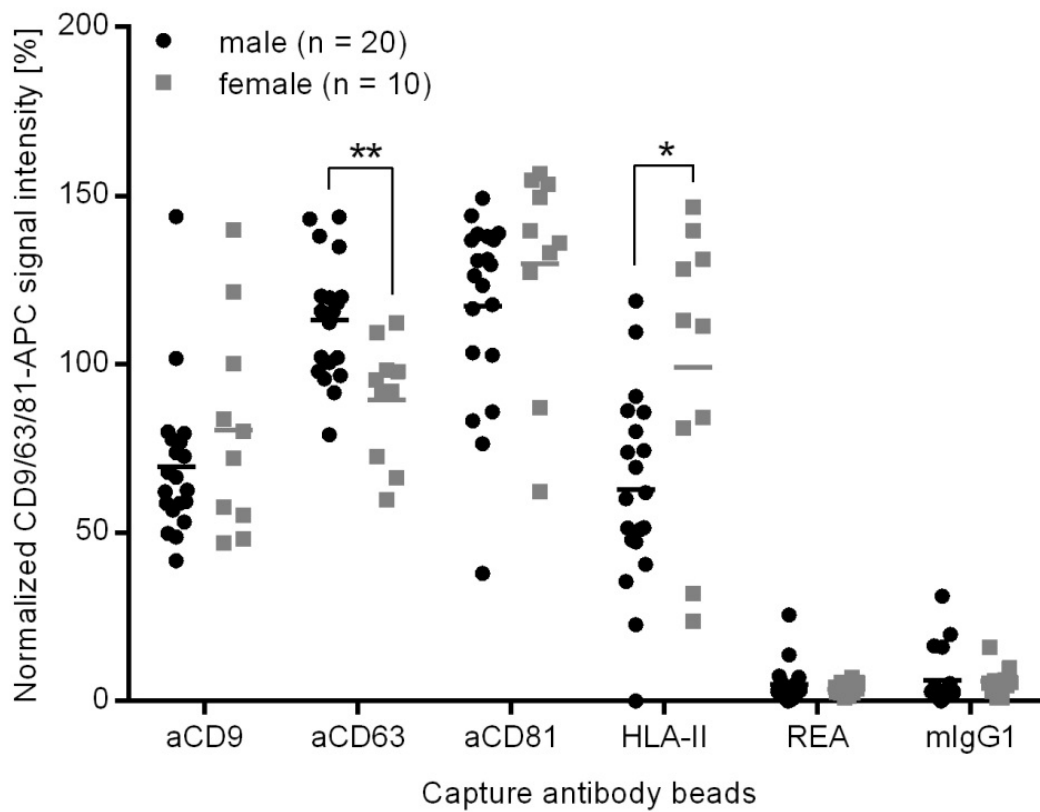

**Supplementary figure 2:** Normalized signal intensities of surface proteins that differed significantly between plasma EVs from male and female donors. The signals for CD9 and CD81 are comparable between the two groups and are depicted for comparison. REA and mIgG1: isotype controls.

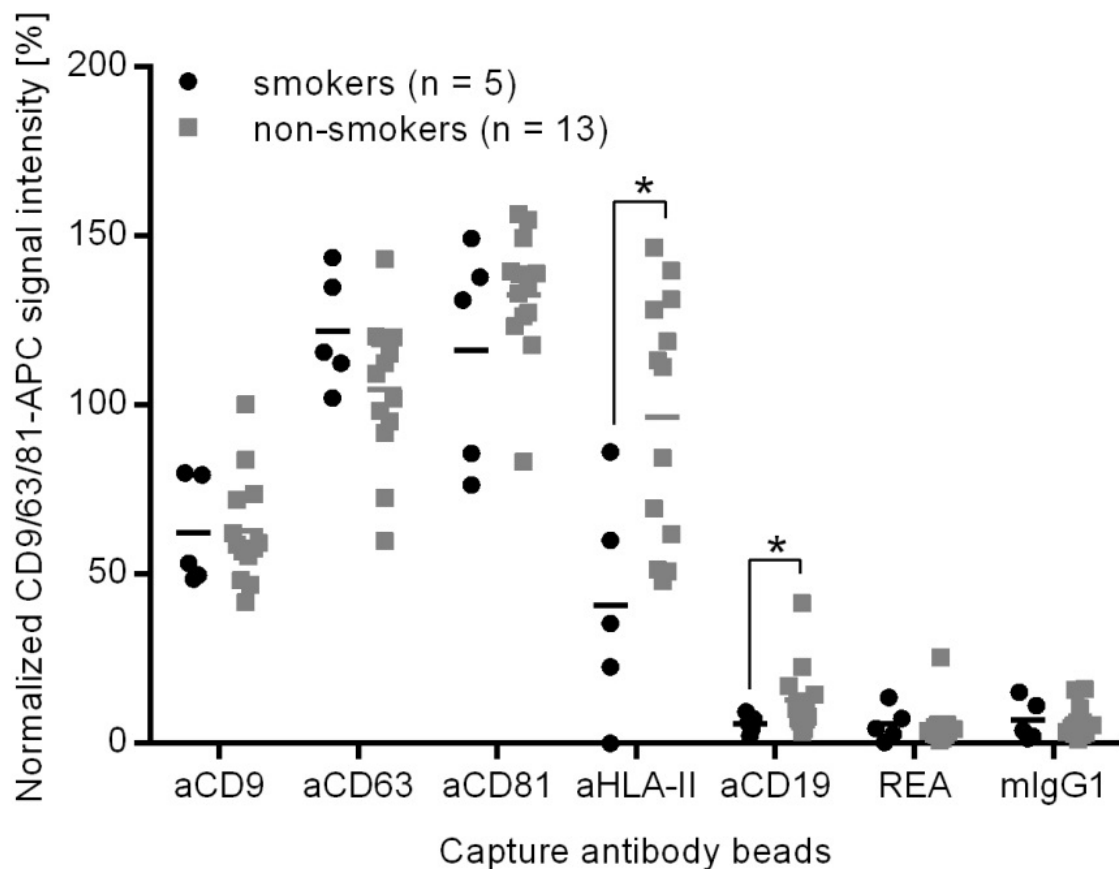

**Supplementary figure 3:** Normalized signal intensities of surface proteins that differed significantly between plasma EVs from healthy donors that are smokers or non-smokers. The signals for CD9, CD63 and CD81 are comparable between the two groups and are depicted for. REA and mIgG1: isotype controls.

**Supplementary table 1:** Correlation plot of normalized signal intensities of 39 surface proteins that were averaged for the investigated samples, including plasma EVs from blood of healthy donors with citrate or heparin, plasma EVs from blood of melanoma patients with heparin and plasma EVs from healthy donors with heparin and no delay (0 min), 30 min delay or 120 min delay between blood draw and plasma isolation.

|          | Citrate | Heparin | Melanoma | 0 min | 30 min | 2 h  |
|----------|---------|---------|----------|-------|--------|------|
| Citrate  |         | 0.93    | 0.61     | 0.93  | 0.94   | 0.95 |
| Heparin  | 0.93    |         | 0.80     | 0.96  | 0.96   | 0.95 |
| Melanoma | 0.61    | 0.80    |          | 0.74  | 0.69   | 0.65 |
| 0 min    | 0.93    | 0.96    | 0.74     |       | 0.99   | 0.98 |
| 30 min   | 0.94    | 0.96    | 0.69     | 0.99  |        | 0.99 |
| 2 h      | 0.95    | 0.95    | 0.65     | 0.98  | 0.99   |      |

**A**

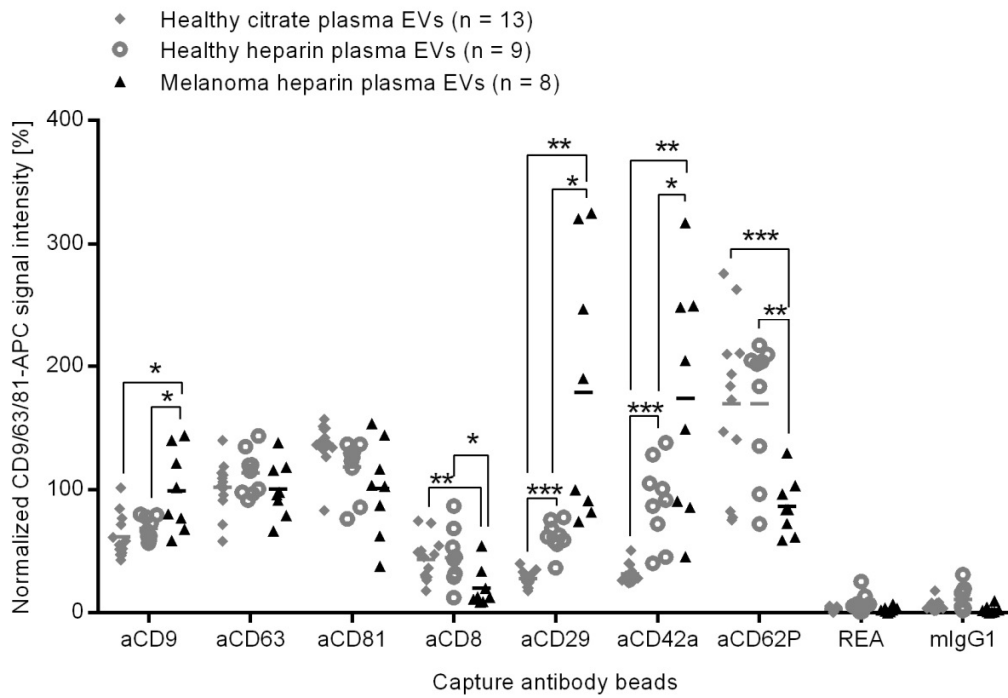

**B**

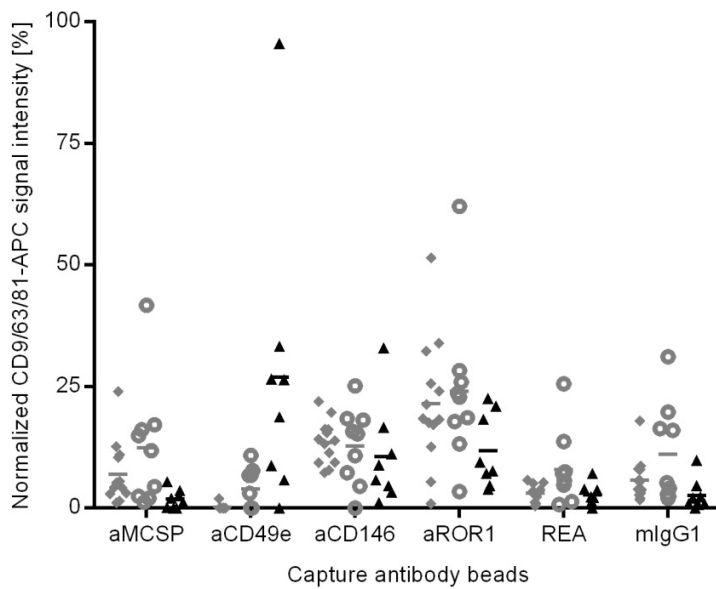

**Supplementary figure 4:** Normalized signal intensities of (A) exosome markers and proteins that differed significantly between plasma EVs of melanoma patients and healthy donors and (B) potential melanoma markers. REA and mIgG1: isotype controls.

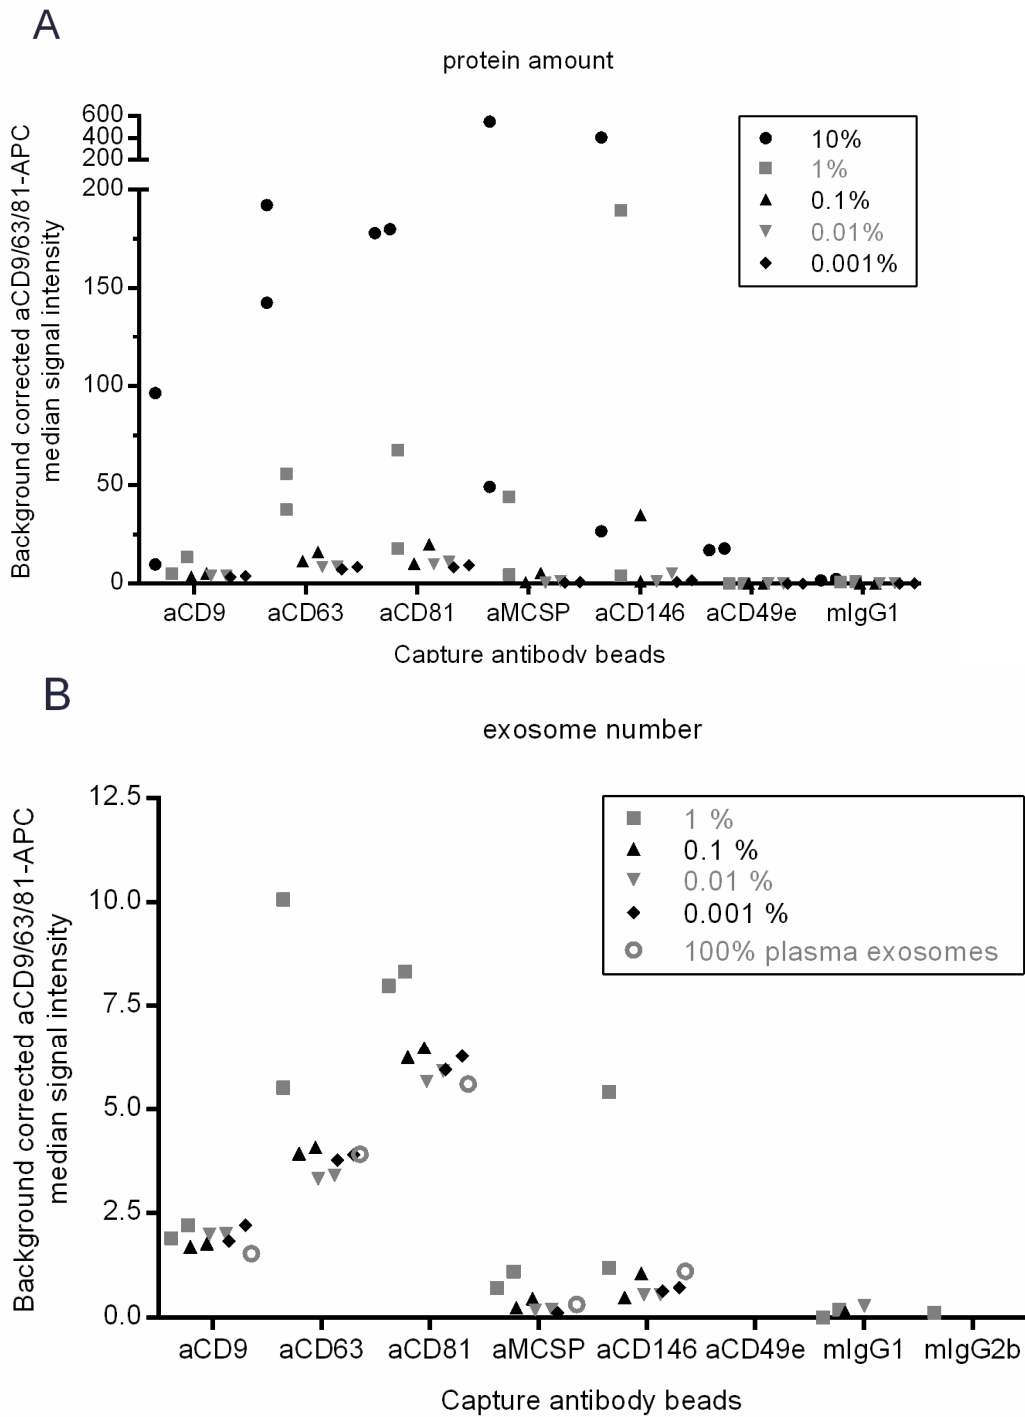

**Supplementary figure 5:** Spike-in of melanoma EVs from two different primary melanoma cell cultures into a plasma EV sample from a healthy donor. (A) The percentage of melanoma EVs refers to the total protein amount in microgram measured by BCA assay, 1% are 0.64  $\mu\text{g}$  or  $\sim 60 \times 10^8$  particles. (B) The percentage of melanoma EVs refers to the total number of particles measured by NTA, 1% are 0.02  $\mu\text{g}$  or  $\sim 1.8 \times 10^8$  particles. mIgG1: isotype control.

**Supplementary table 2:** Overview of healthy donors and melanoma patients. N.a. = not applicable.

|                             | <b>Donor no</b> | <b>Age in 2015</b> | <b>sex</b> | <b>Smoking habit</b> | <b>Medication</b>      | <b>Needle type, tube type</b>                                                          |
|-----------------------------|-----------------|--------------------|------------|----------------------|------------------------|----------------------------------------------------------------------------------------|
| Healthy donors with citrate | D1              | 29                 | f          | non-smoker           | Hormonal contraception | Safety Blood Collection Set, Greiner, 21G x 3/4", 0.105M sodium citrate Vacutainer, BD |
|                             | D2              | 42                 | f          | non-smoker           | Thyronaiod 50          |                                                                                        |
|                             | D3              | 41                 | m          | non-smoker           | non                    |                                                                                        |
|                             | D4              | 33                 | f          | non-smoker           | non                    |                                                                                        |
|                             | D5              | 33                 | f          | non-smoker           | non                    |                                                                                        |
|                             | D6              | 34                 | f          | non-smoker           | non                    |                                                                                        |
|                             | D7              | 24                 | m          | smoker               | non                    |                                                                                        |
|                             | D8              | 44                 | m          | smoker               | non                    |                                                                                        |
|                             | D9              | 46                 | f          | non-smoker           | non                    |                                                                                        |
|                             | D10             | 44                 | m          | non-smoker           | Berodual if needed     |                                                                                        |
|                             | D11             | 37                 | f          | non-smoker           | non                    |                                                                                        |
|                             | D12             | 33                 | m          | smoker               | non                    |                                                                                        |
|                             | D13             | 37                 | m          | non-smoker           | non                    |                                                                                        |
| Healthy donors with heparin | D1              | 40                 | m          | non-smoker           | n. a.                  | Safety Blood Collection Set, Greiner, 21G x 3/4", 17 IU/ml heparin, BD                 |
|                             | D2              | 33                 | m          | smoker               | n. a.                  |                                                                                        |
|                             | D3              | 24                 | m          | smoker               | n. a.                  |                                                                                        |
|                             | D4              | 37                 | m          | non-smoker           | n. a.                  |                                                                                        |
|                             | D5              | 37                 | m          | non-smoker           | n. a.                  |                                                                                        |
|                             | D6              | 32                 | m          | n. a.                | n. a.                  |                                                                                        |
|                             | D7              | 63                 | m          | n. a.                | n. a.                  |                                                                                        |
|                             | D8              | 38                 | m          | n. a.                | n. a.                  |                                                                                        |
|                             | D9              | 25                 | m          | n. a.                | n. a.                  |                                                                                        |
| Melanoma patients           | D1              | 70                 | m          | n. a.                | n. a.                  |                                                                                        |
|                             | D2              | 75                 | f          | n. a.                | n. a.                  |                                                                                        |
|                             | D3              | 46                 | m          | n. a.                | n. a.                  |                                                                                        |
|                             | D4              | 48                 | m          | n. a.                | n. a.                  |                                                                                        |
|                             | D5              | 50                 | f          | n. a.                | n. a.                  |                                                                                        |
|                             | D6              | 53                 | m          | n. a.                | n. a.                  |                                                                                        |
|                             | D7              | 75                 | m          | n. a.                | n. a.                  |                                                                                        |
|                             | D8              | 53                 | f          | n. a.                | n. a.                  |                                                                                        |

**Supplementary table 3:** List of antibodies used as capture antibodies bound to the polystyrene particles in the multiplex platform

|    | <b>Capture antibody</b> | <b>Clone</b> | <b>Target</b>                                                                                                                        | <b>Supplier</b> |
|----|-------------------------|--------------|--------------------------------------------------------------------------------------------------------------------------------------|-----------------|
| 1  | Anti-ASGPR              | 8D7          | Asialoglycoprotein receptor 1, liver cells                                                                                           | BD Biosciences  |
| 2  | Anti-Fibroblast         | REA165       | fibroblasts, epithelial cells, peripheral blood myeloid cells, subset of lymphocytes                                                 | Miltenyi Biotec |
| 3  | CD9                     | SN4          | Exosome marker                                                                                                                       | Miltenyi Biotec |
| 4  | CD63                    | H5C6         | Exosome marker                                                                                                                       | Miltenyi Biotec |
| 5  | CD81                    | 5A6          | Exosome marker                                                                                                                       | BioLegend       |
| 6  | CD82                    | REA          | Exosome marker                                                                                                                       | Miltenyi Biotec |
| 7  | CD1c                    | AD5-8E7      | BDCA-1, major subpopulation of human myeloid dendritic cells                                                                         | Miltenyi Biotec |
| 8  | CD2                     | LT2.2        | T cells, subset of NK cells                                                                                                          | Miltenyi Biotec |
| 9  | CD3                     | BW 264/56    | mature human T cells, thymocytes, subset of NK cells                                                                                 | Miltenyi Biotec |
| 10 | CD4                     | Vit-4.3      | T helper cells, thymocytes, monocytes, dendritic cells                                                                               | Miltenyi Biotec |
| 11 | CD8                     | BW 135/80    | cytotoxic T cells, thymocytes, subset of NK cells                                                                                    | Miltenyi Biotec |
| 12 | CD11a                   | REA378       | integrin $\alpha$ -L (ITGAL), leukocytes, T cells, granulocytes, monocytes, other                                                    | Miltenyi Biotec |
| 13 | CD11c                   | MJ4-27G12    | integrin $\alpha$ X or CR4, monocytes, macrophages, NK cells, granulocytes, myeloid dendritic cells (MDCs), subsets of T and B cells | Miltenyi Biotec |
| 14 | CD13                    | REA263       | granulocytes, myeloid progenitors, endothelial cells, epithelial cells, and subset of granular lymphoid cells                        | Miltenyi Biotec |
| 15 | CD14                    | TÜK4         | monocytes and macrophages, subset of neutrophils and myeloid dendritic cells                                                         | Miltenyi Biotec |
| 16 | CD19                    | LT-19        | B cells                                                                                                                              | Miltenyi Biotec |
| 17 | CD20                    | LT20.34      | B lineage cells from the pre-B cell stage to the B cell lymphoblast stage                                                            | Miltenyi Biotec |
| 18 | CD24                    | 32D12        | heat-stable antigen (HSA)                                                                                                            | Miltenyi Biotec |
| 19 | CD25                    | 3G10         | activated T and B cells, macrophages, subset of non-activated CD4+ regulatory T cells                                                | Miltenyi Biotec |
| 20 | CD29                    | TS2/16.2.1   | integrin beta 1                                                                                                                      | Miltenyi Biotec |

|    | <b>Capture antibody</b> | <b>Clone</b>    | <b>Target</b>                                                                                                                                                                                                    | <b>Supplier</b> |
|----|-------------------------|-----------------|------------------------------------------------------------------------------------------------------------------------------------------------------------------------------------------------------------------|-----------------|
| 21 | CD31                    | AC128           | monocytes, platelets, and granulocytes                                                                                                                                                                           | Miltenyi Biotec |
| 22 | CD33                    | AC104.3E3       | Monocytes, granulocytes, some myeloid dendritic cells                                                                                                                                                            | Miltenyi Biotec |
| 23 | CD40                    | HB14            | B cells, macrophages, dendritic cells, endothelial cells, fibroblasts, plasma cells, subset of peripheral T cells                                                                                                | Miltenyi Biotec |
| 24 | CD41b                   | REA336          | $\beta$ chain of Integrin $\alpha$ -IIb, megakaryocytes, platelets                                                                                                                                               | Miltenyi Biotec |
| 25 | CD42a                   | REA209          | Platelets, megakaryocytes                                                                                                                                                                                        | Miltenyi Biotec |
| 26 | CD44                    | DB105           | Cancer stem cells (CSC), hematopoietic, fibroblastic, and glial cells.                                                                                                                                           | Miltenyi Biotec |
| 27 | CD45                    | 5B1             | leukocyte common antigen                                                                                                                                                                                         | Miltenyi Biotec |
| 28 | CD49e                   | NKI-SAM1        | integrin $\alpha$ 5 chain, lymphocytes, monocytes, fibroblasts, endothelial cells                                                                                                                                | Nordic-MUBio    |
| 29 | CD51                    | REA181          | $\alpha$ V integrin                                                                                                                                                                                              | Miltenyi Biotec |
| 30 | CD56                    | REA196          | neural cell adhesion molecule (NCAM), resting and activated NK cells, minor subset of CD3+ T cells                                                                                                               | Miltenyi Biotec |
| 31 | CD61                    | VI-PL2          | integrin $\beta$ 3, megakaryocytes and platelets                                                                                                                                                                 | BD Biosciences  |
| 32 | CD62P                   | REA389          | P-selectin, vascular endothelial cells and platelets                                                                                                                                                             | Miltenyi Biotec |
| 33 | CD69                    | FN50            | Activated lymphocytes, monocytes, and platelets                                                                                                                                                                  | Miltenyi Biotec |
| 34 | CD80                    | 2D10            | B7-1, activated B cells, dendritic cells, and monocytes/ macrophages                                                                                                                                             | Miltenyi Biotec |
| 35 | CD83                    | HB15            | activated dendritic cells                                                                                                                                                                                        | Miltenyi Biotec |
| 36 | CD86                    | FM95            | B7-2, activated B and T cells, dendritic cells, and monocytes/macrophages                                                                                                                                        | Miltenyi Biotec |
| 37 | CD95                    | DX2             | Fas, Apo-1, activated lymphocytes                                                                                                                                                                                | Miltenyi Biotec |
| 38 | CD105                   | 43A4E1.71       | mature endothelial cells, some leukemic cells of B lymphoid and myeloid origin                                                                                                                                   | Miltenyi Biotec |
| 39 | CD133                   | AC133.1.6.2.1.1 | multipotent progenitor cells, including immature hematopoietic stem and progenitor cells, circulating endothelial progenitor cells, fetal neural stem cells, other tissue-specific stem cells, cancer stem cells | Miltenyi Biotec |



|    | <b>Capture antibody</b> | <b>Clone</b>   | <b>Target</b>                                                                                                                                                                                                                                   | <b>Supplier</b> |
|----|-------------------------|----------------|-------------------------------------------------------------------------------------------------------------------------------------------------------------------------------------------------------------------------------------------------|-----------------|
| 40 | CD142                   | HTF-1          | Tissue factor, activated endothelial cells, monocytes, macrophages, platelets, and some tumor cell types                                                                                                                                        | Miltenyi Biotec |
| 41 | CD146                   | 541-10B2       | MUC18, MCAM, Mel-CAM, endothelial cells, pericytes, smooth muscle cells, follicular dendritic cells, melanoma cells, sub-population of activated T lymphocytes, marrow stromal cells (MSCs)                                                     | Miltenyi Biotec |
| 42 | CD184                   | 12G5           | CXCR4, blood and tissue cells                                                                                                                                                                                                                   | Miltenyi Biotec |
| 43 | CD197                   | FR11-11E8.17.3 | CCR7, B cells, dendritic cells, macrophages, NK cells, T cells, thymocytes                                                                                                                                                                      | Miltenyi Biotec |
| 44 | CD209                   | DCN-47.5.4     | DC-SIGN, dendritic cells, endothelial cells, macrophages, spleen                                                                                                                                                                                | Miltenyi Biotec |
| 45 | CD235a                  | REA175         | Glycophorin-A, mature erythrocytes and erythroid precursor cells                                                                                                                                                                                | Miltenyi Biotec |
| 46 | CD253                   | RIK-2.1        | TRAIL ligand, activated lymphocytes                                                                                                                                                                                                             | Miltenyi Biotec |
| 47 | CD263                   | DJR3           | TRAIL receptor, peripheral blood lymphocytes, spleen, skeletal muscle, placenta, lung and heart                                                                                                                                                 | Miltenyi Biotec |
| 48 | CD326                   | HEA125         | EpCAM, basolateral surface of carcinoma and epithelial cells in tissues, circulating tumor cells, cancer stem cells, not on melanoma, neuroblastoma, sarcoma, lymphoma, leukemia cells, or normal fibroblasts                                   | Miltenyi Biotec |
| 49 | HLA-ABC                 | REA230         | Nuclear cells                                                                                                                                                                                                                                   | Miltenyi Biotec |
| 50 | HLA-DQ                  | REA            | Antigen-presenting cells                                                                                                                                                                                                                        | Miltenyi Biotec |
| 51 | HLA-DP/DQ/DR            | REA332         | Antigen-presenting cells                                                                                                                                                                                                                        | Miltenyi Biotec |
| 52 | MCSP                    | EP-1           | melanoma-associated chondroitin sulfate proteoglycan antigen, melanoma tissues and melanoma cell lines but not carcinoma cells, fibroblastoid cells, and cells of hematopoietic origin                                                          | Miltenyi Biotec |
| 53 | ROR1                    | 2A2            | receptor tyrosine kinase-like orphan receptor 1, chronic lymphocytic leukemia (CLL) and mantle cell lymphoma (McLellan), ovarian cancer, renal cancer, melanoma, and lung adenocarcinoma, adipose tissue, at early stages of B cell development | Miltenyi Biotec |

|    | <b>Capture antibody</b> | <b>Clone</b> | <b>Target</b>                                                                                                                                                                                           | <b>Supplier</b> |
|----|-------------------------|--------------|---------------------------------------------------------------------------------------------------------------------------------------------------------------------------------------------------------|-----------------|
| 54 | SSEA-4                  |              | Stage-specific embryonic antigen 4, undifferentiated human embryonic stem (ES) cells, induced pluripotent (iPS) cells embryonal carcinoma (EC) cells, and embryonic germ (EG) cells, somatic stem cells | Miltenyi Biotec |
| 55 | mIgG1                   | IS5-21F5     | Isotype control                                                                                                                                                                                         | Miltenyi Biotec |
| 56 | mIgG2a                  | S43.10       | Isotype control                                                                                                                                                                                         | Miltenyi Biotec |
| 57 | mIgG2b                  | IS6-11E5     | Isotype control                                                                                                                                                                                         | Miltenyi Biotec |
| 58 | REA                     | REA293       | Isotype control                                                                                                                                                                                         | Miltenyi Biotec |

McLellan, A.D. (2009). Exosome release by primary B cells. *Critical reviews in immunology* 29, 203-217. doi:

Mullier, F., N. Bailly, C. Chatelain, B. Chatelain, and J.M. Dogne (2013). Pre-analytical issues in the measurement of circulating microparticles: current recommendations and pending questions. *Journal of thrombosis and haemostasis : JTH* 11, 693-696. doi: 10.1111/jth.12171

Witwer, K.W., E.I. Buzas, L.T. Bemis, A. Bora, C. Lasser, J. Lotvall, E.N. Nolte-'t Hoen, M.G. Piper, S. Sivaraman, J. Skog, C. Thery, M.H. Wauben, and F. Hochberg (2013). Standardization of sample collection, isolation and analysis methods in extracellular vesicle research. *Journal of extracellular vesicles* 2. doi: 10.3402/jev.v2i0.20360
